# Supplementary material for: An anthraquinone-imidazole-based colorimetric and fluorescent sensor for the sequential detection of Ag+ and biothiols in living cells
Source: Royal Society of Chemistry journal article supplement (doi:10.1039/d0an00164c), 2020-01-01
Supplement: d0an00164c1.pdf [file d0an00164c1.pdf]

## Electronic Supporting Information

### **An Anthraquinone-imidazole-based colorimetric and fluorescent sensor for sequential detection of Ag<sup>+</sup> and biothiols in living cells**

Chen Zhao<sup>a</sup>, Xiangyu Kong<sup>a</sup>, Shaomin Shuang<sup>a</sup>, Yu Wang<sup>a,\*</sup> and Chuan Dong<sup>b,\*</sup>

<sup>a</sup> School of Chemistry and Chemical Engineering, Shanxi University, Taiyuan 030006, PR China

<sup>b</sup> Institute of Environmental Science, Shanxi University, Taiyuan 030006, PR China

\* Corresponding authors. Tel.: +86-351-7018246; fax: +86-351-7018246.

E-mail: wangyu1168@sxu.edu.cn (Y. Wang), dc@sxu.edu.cn (C. Dong)

## **Content**

### **Experimental Instrumentation**

**Figure S1.** Effect of pH

**Figure S2.** Job's plot and B-H plot with UV-vis

**Figure S3.** Effect of response time

**Figure S4.** Fluorescence lifetime of FAI and FAI-Ag<sup>+</sup> complex

**Figure S5.** FT-IR spectra of FAI and FAI-Ag<sup>+</sup> complex

**Figure S6.** Reversibility experiments

**Figure S7.** Cytotoxicity assays

**Figure S8.**  $^1\text{H}$  NMR spectrum of sensor FAI

**Figure S9.**  $^{13}\text{C}$  NMR spectrum of sensor FAI

**Figure S10.** Mass spectrum (ESI) of sensor FAI

## Instrumentation

The UV absorption and fluorescence spectra were recorded using a Hitachi U-2910 spectrophotometer (Tokyo, Japan) and a Hitachi F-4600 spectrofluorometer (Tokyo, Japan), respectively. The excitation wavelength was chosen as 470 nm and both the excitation and emission slits were set at 10 nm. Fluorescence lifetimes of FAI and FAI- $\text{Ag}^+$  complex were measured with a FLS-920 Fluorescence Spectrometer. IR spectra were recorded on a TENSOR II infrared spectrometer (Bruker, Germany). NMR spectra were measured on a Bruker instrument. HRMS of FAI and FAI- $\text{Ag}^+$  complex were obtained with a Thermo Scientific Q Exactive. The pH values were measured on a pH-FE20 acidometer.

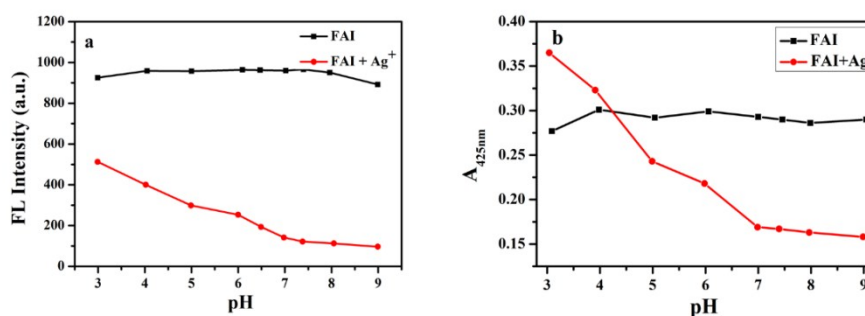

Fig. S1 (a) Effect of pH on the fluorescence intensity of FAI and FAI- $\text{Ag}^+$  at 606 nm.  $[\text{FAI}] = 8 \mu\text{M}$ ,  $[\text{Ag}^+] = 80 \mu\text{M}$ . (b) Effect of pH on the absorbance intensity of FAI and FAI- $\text{Ag}^+$  at 425 nm.  $[\text{FAI}] = 20 \mu\text{M}$ ,  $[\text{Ag}^+] = 200 \mu\text{M}$ .

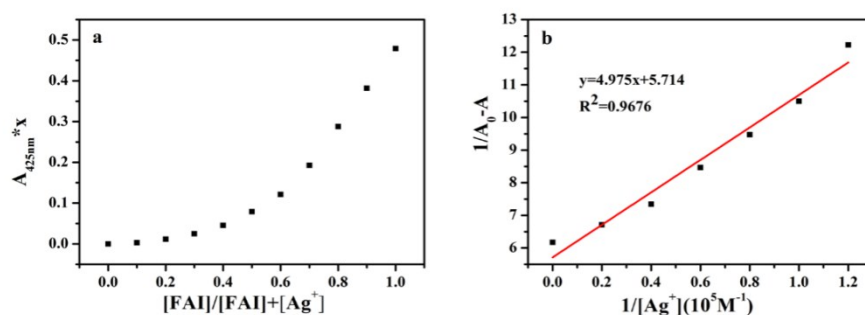

Fig. S2 (a) Job's plot from ultraviolet absorption for FAI and  $\text{Ag}^+$  complexation in 1,4-dioxane- $\text{H}_2\text{O}$  (3:7, v/v; pH 7.4), the total concentration of FAI and  $\text{Ag}^+$  40  $\mu\text{M}$ ; (b) Benesi-Hildebrand plot

from UV-vis titration data of FAI with  $\text{Ag}^+$ .

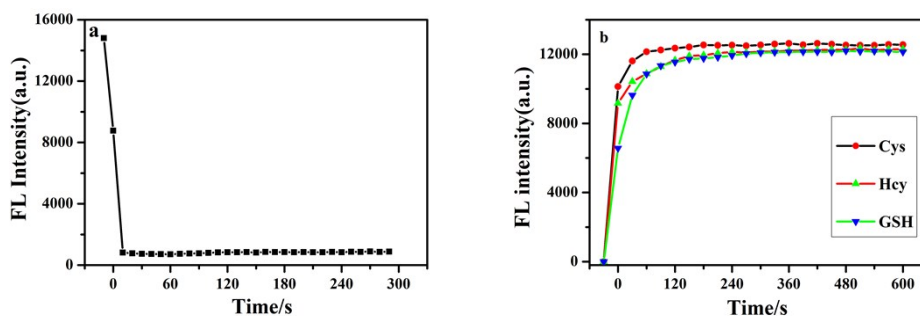

Fig. S3 (a) The fluorescence intensity at 606 nm of FAI as a function of time after adding  $\text{Ag}^+$ . (b) The fluorescence intensity at 606 nm of FAI- $\text{Ag}^+$  as a function of time after adding Cys, Hcy and GSH.

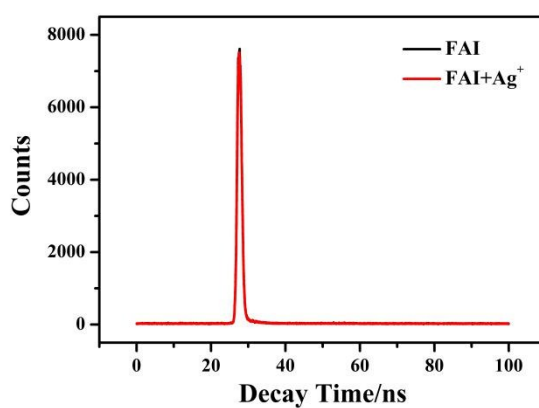

Fig. S4 Lifetime decay profiles of FAI (8  $\mu\text{M}$ ) in the absence and presence of  $\text{Ag}^+$  (8  $\mu\text{M}$ ) in 1,4-dioxane- $\text{H}_2\text{O}$  (3:7, v/v; pH 7.4).

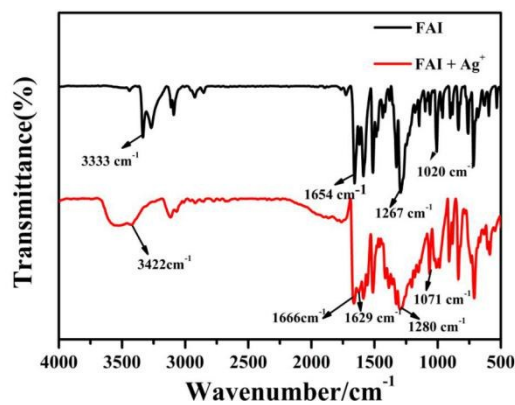

Fig. S5 Partial FTIR spectra of FAI and FAI- $\text{Ag}^+$  complex.

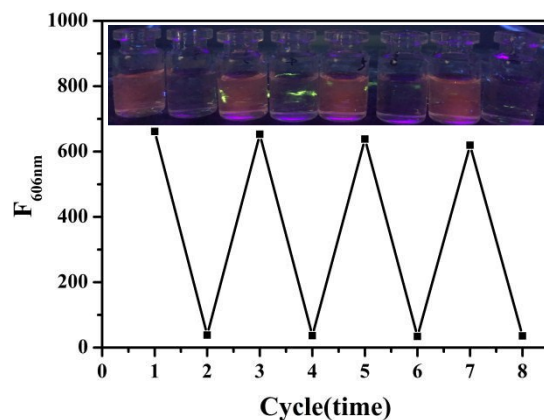

Fig. S6 Fluorescence experiment showing the reversibility and reusability of FAI for sensing  $Ag^+$  and Cys sequentially. Above: Visual fluorescence color changes after each addition of  $Ag^+$  and Cys sequentially.

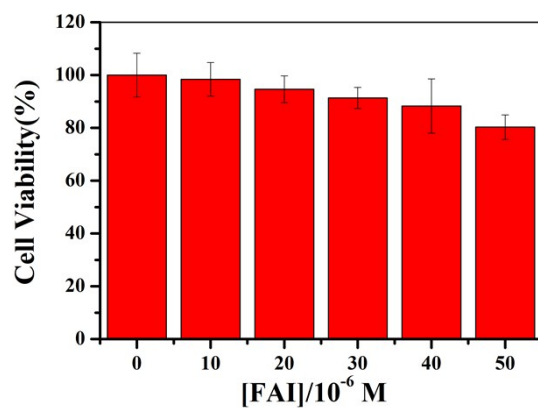

Fig. S7 Cell cytotoxic effect of L on SMMC-7721 cells.

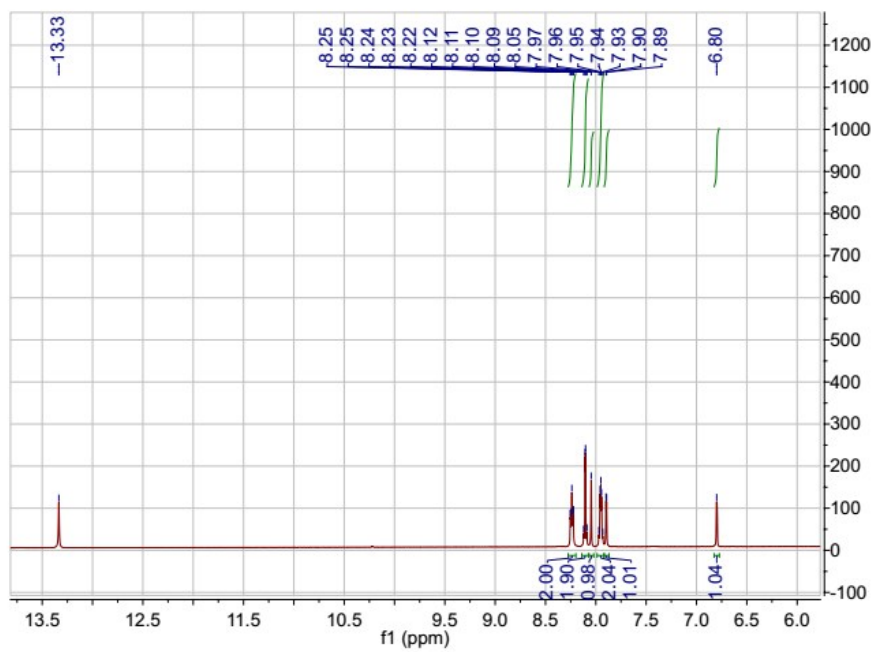

Fig. S8 <sup>1</sup>H NMR spectrum of sensor FAI.

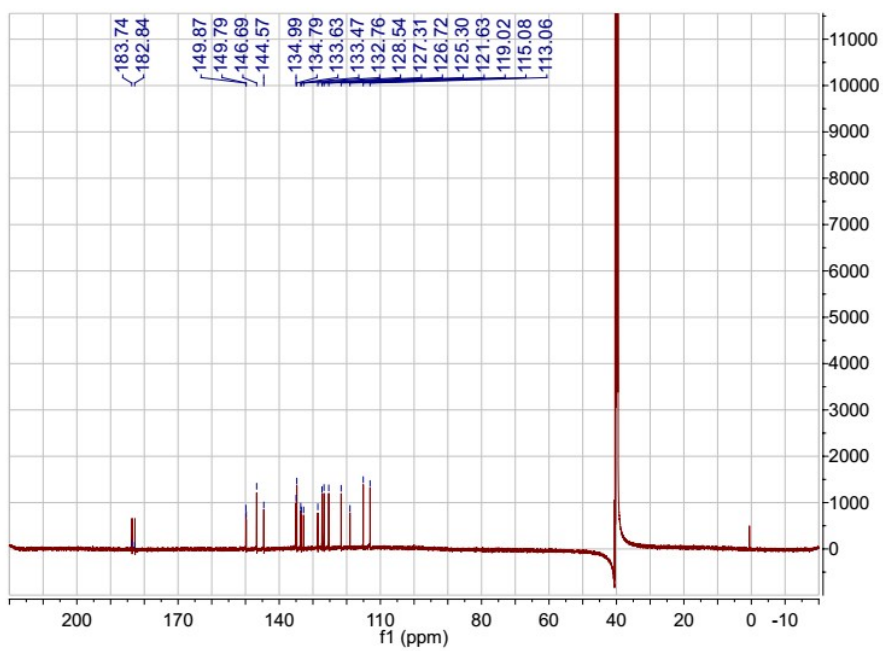

Fig. S9 <sup>13</sup>C NMR spectrum of sensor FAI.

ZC0107 #15 RT: 0.15 AV: 1 NL: 4.92E6  
T: FTMS - p ESI Full ms [150.0000-600.0000]

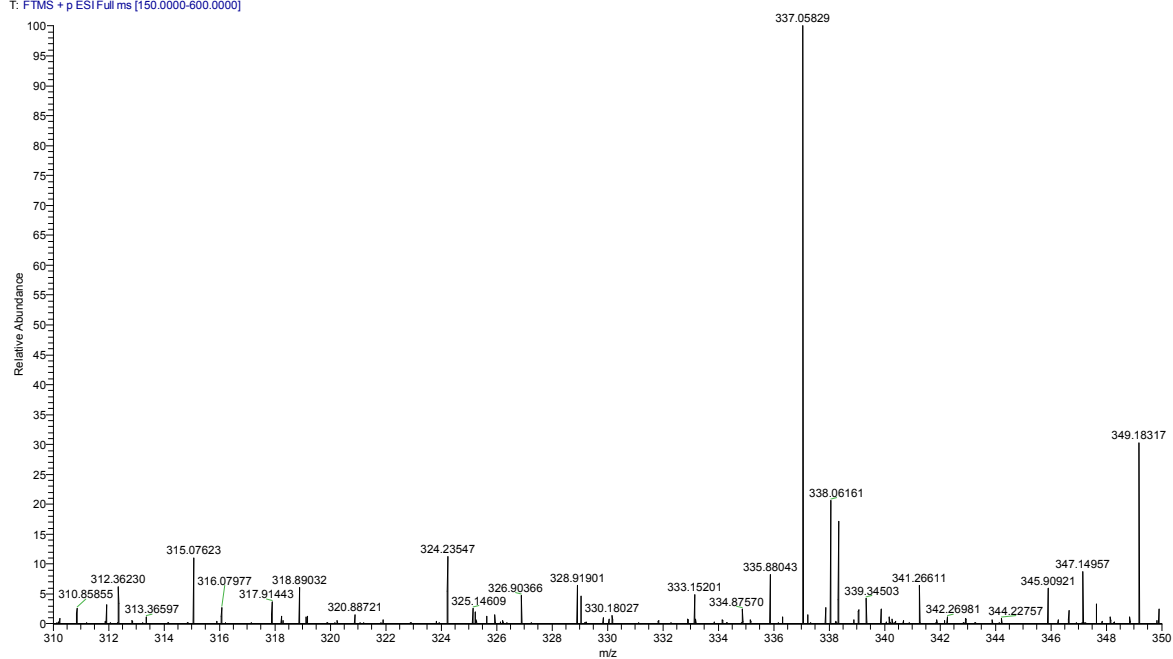

Fig.S10 Mass spectrum (ESI) of sensor FAI
